# Supplementary material
Source: publisher figshare collection journal article supplement (https://acs.figshare.com/ndownloader/files/4668811)
Supplement: Supplementary file 1 [file 4668811]

## Supporting Information For:

# Thorough Chemical Modification of Wood Based Lignocellulosic Materials in Ionic Liquids

Haibo Xie,<sup>a</sup> Alistair King,<sup>b</sup> Ilkka Kilpelainen,<sup>b</sup> Mari Granstrom<sup>b</sup>, Dimitris S. Argyropoulos<sup>\*a,b</sup>

<sup>a</sup> *Organic Chemistry of Wood Components Laboratories, Department of Forest Biomaterials Science & Engineering,*

*College of Natural Resources, North Carolina State University, Raleigh, North Carolina 27695-8005. Fax: (919)*

*515-7708; Fax (919) 515-6302; e-mail: dsargyro@ncsu.edu*

<sup>b</sup> *Department of Chemistry, Laboratory of Organic Chemistry, P.O. Box 55, FIN-00014 University of Helsinki, Finland*

|                                                                                                                          |    |
|--------------------------------------------------------------------------------------------------------------------------|----|
| List of Contents for Supplementary Material                                                                              | S1 |
| <b>Figure S1</b> <sup>1</sup> H NMR of Fresh [bmim]Cl and recycled [bmim]Cl                                              | S2 |
| <b>Figure S2</b> : IR of a: Spruce TMP fibers and b: Acetylated Spruce TMP with 65% WPG ( entry A7, Table 1) in [bmim]Cl | S3 |
| <b>Figure S3:</b> IR of a: Spruce TMP and b: Benzoylated spruce ( entry B2, Table 2) with 150% of WPG in [bmim]Cl        | S4 |
| <b>Figure S4:</b> IR of a: Spruce TMP and b: Carbanilated Spruce with 165% of WPG (entry C5, Table 3) in [bmim]Cl        | S5 |

## Figures

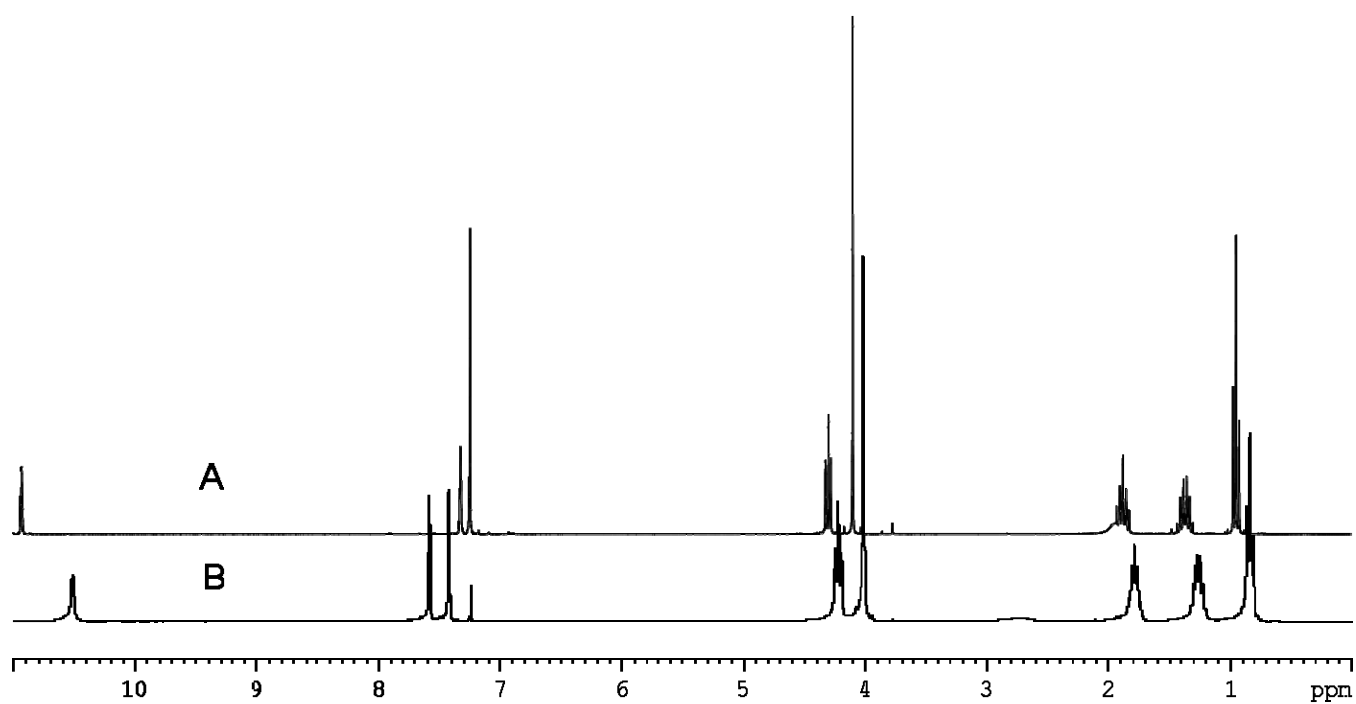

**Figure S1**  $^1\text{H}$  NMR of A: Fresh [bmim]Cl and B: recycled [bmim]Cl

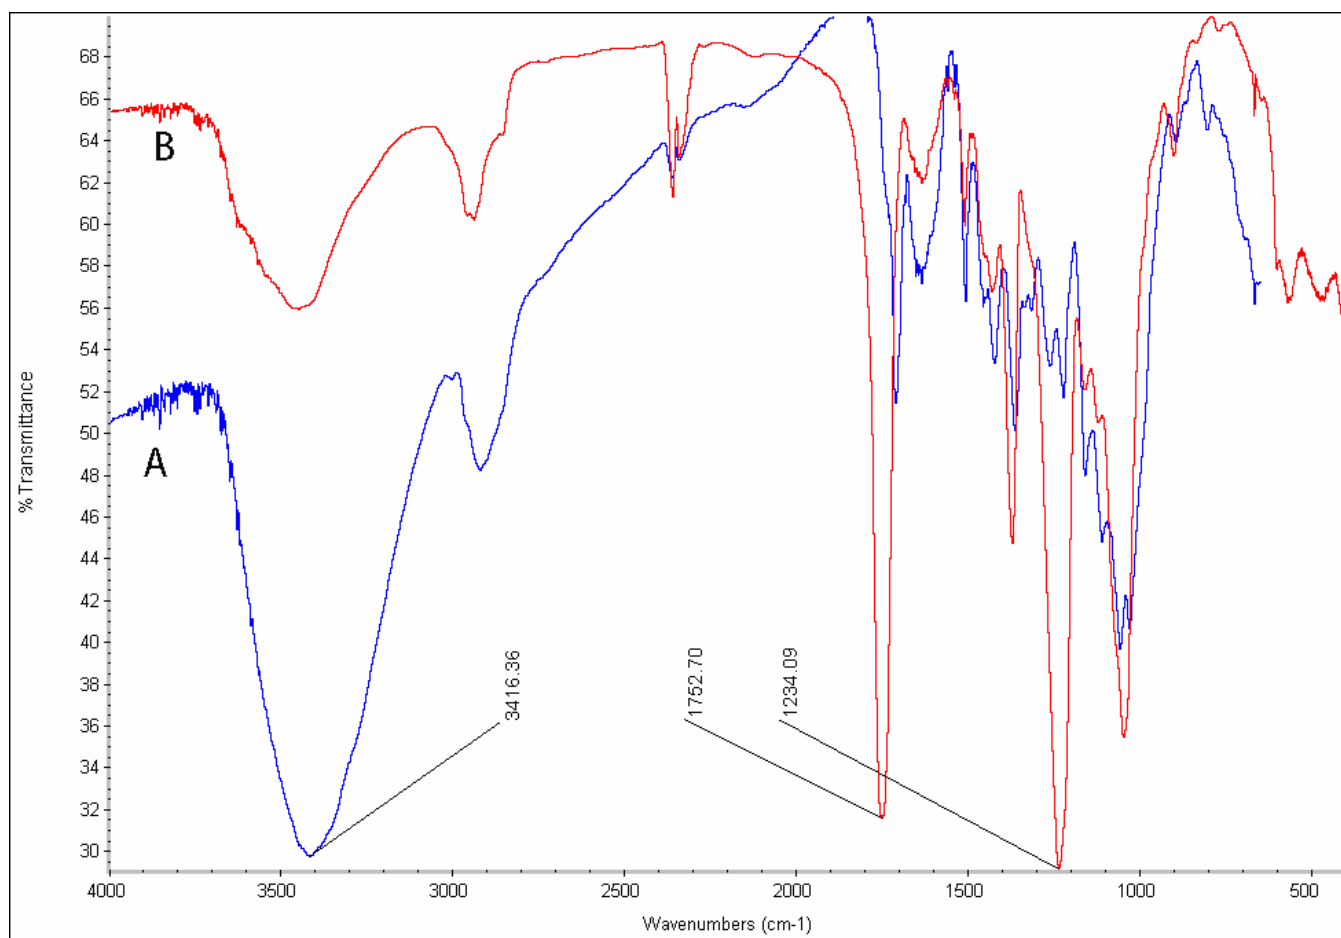

**Figure S2.** IR of A: Spruce TMP fibers and B: Acetylated Spruce TMP with 65% WPG (entry A7, table 1) in [bmim]Cl

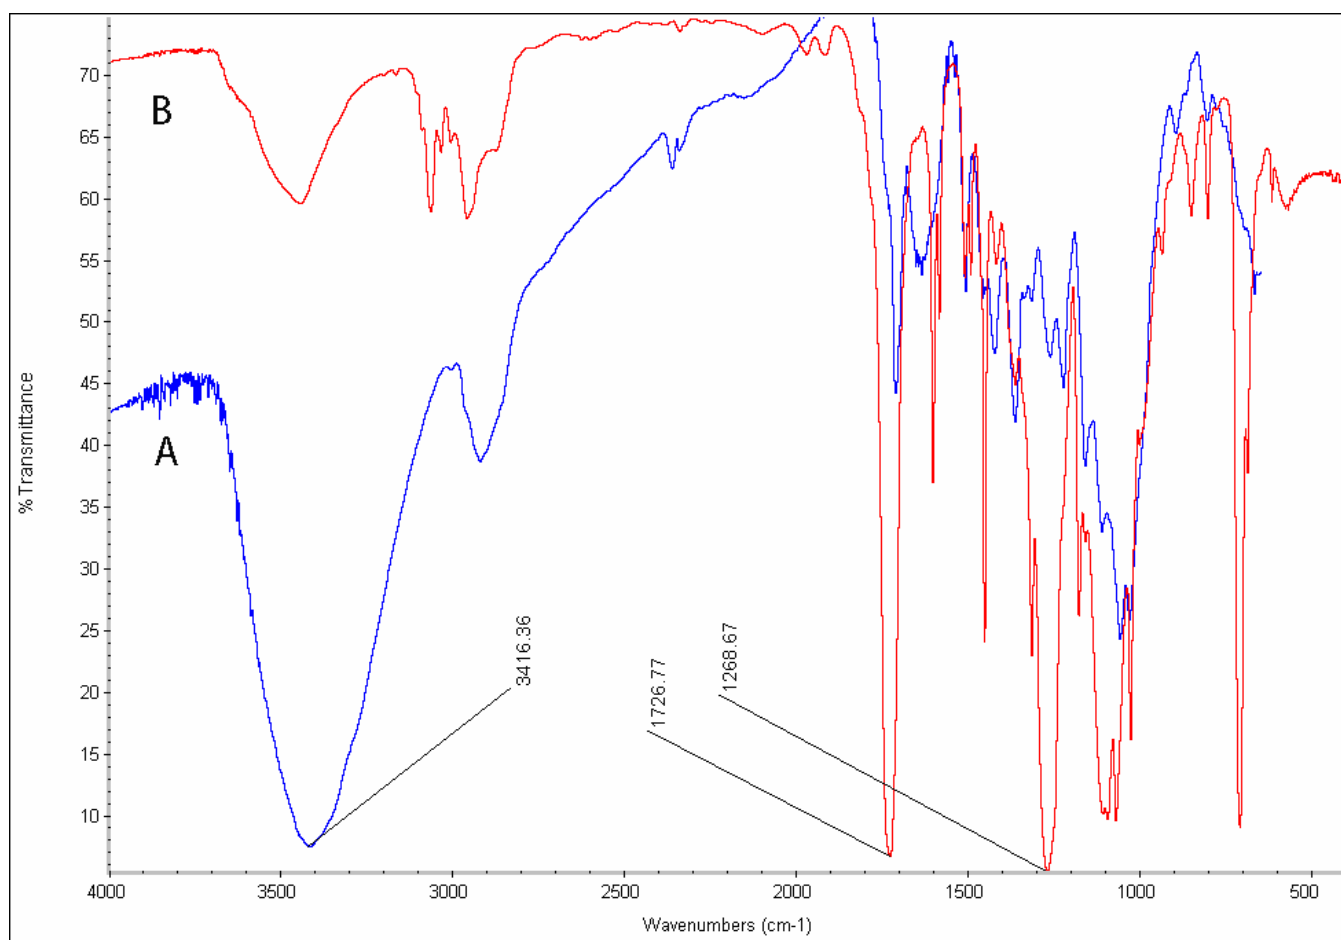

**Figure S3.** IR of A: Spruce TMP and B: Benzoylated spruce (entry B2, table 2) with 150% of WPG in [bmim]Cl

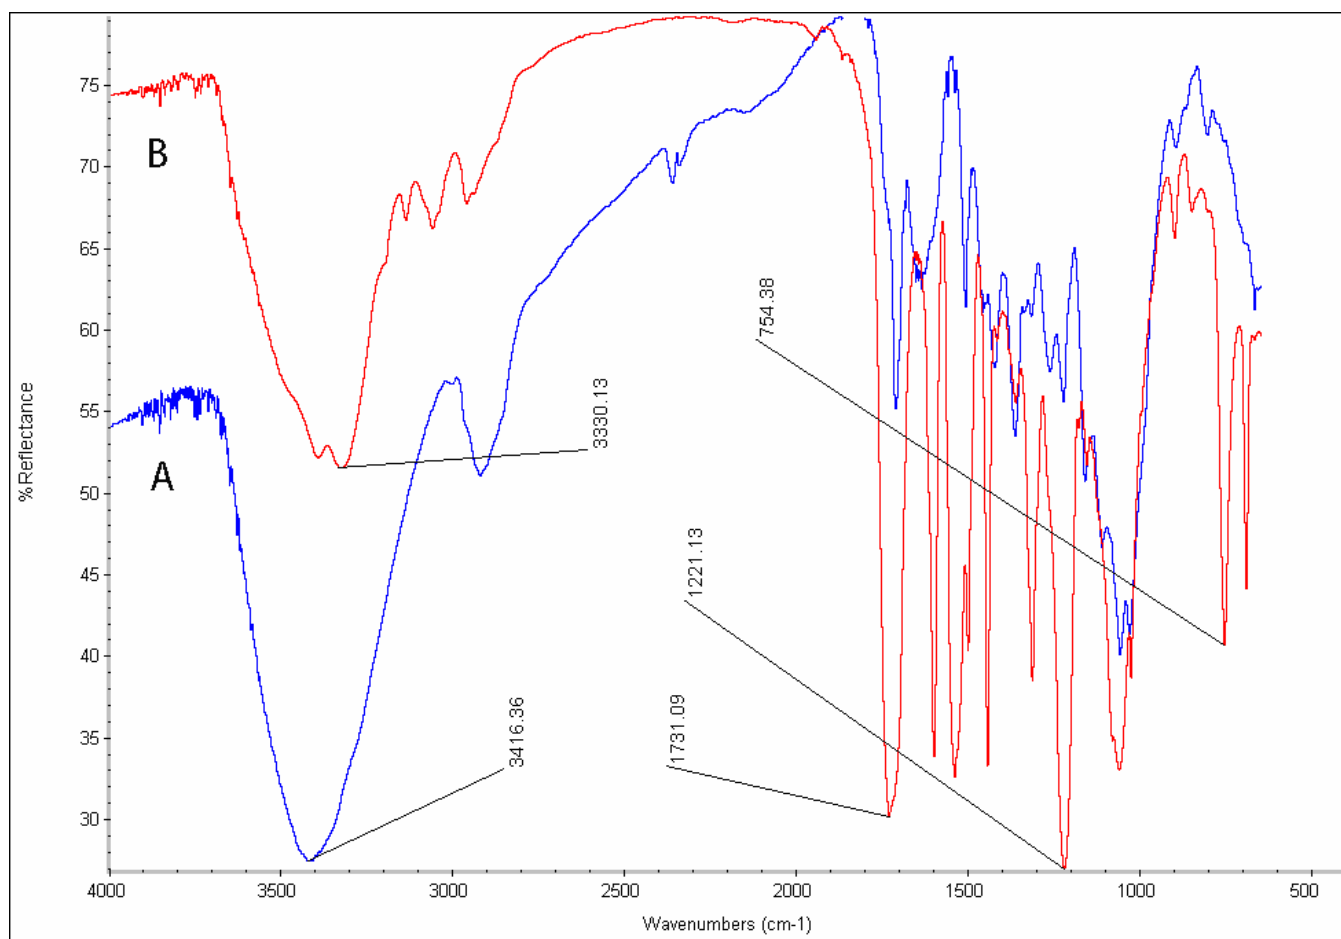

**Figure S4.** IR of A: Spruce TMP and B: Carbanilated Spruce with 165% of WPG (entry C5, Table 3) in [bmim]Cl
